# Supplementary material for: Play to Win: Action Video Game Experience and Attention Driven Perceptual Exploration in Categorization Learning
Source: PubMed Central journal article supplement (PMC7239510; doi:10.3389/fpsyg.2020.00933), 2020-05-13
Supplement: Data_Sheet_1.pdf [file Data_Sheet_1.pdf]

## SUPPLEMENTARY MATERIALS

### Gender related Analysis

The calculated ANOVA for the response times yielded evidence for a main effect of the factor “stimulus” ( $F_{1,30} = 36.05$ ;  $p = 0.0001$ ), a main effect of the factor “block” ( $F_{4,120} = 29.66$ ;  $p = 0.0001$ ), as well as an interaction of the factors “stimulus” and “block” ( $F_{4,120} = 2.72$ ;  $p = 0.04$ ). The three-way interaction did not reach significance. Reaction times separated for groups (gamer and non-gamer) and sex are illustrated in Figure 6. The reaction times decreased during the experiment (block 1 to block 5) for both stimulus types. The largest difference seemed to be in block 3. However, participants categorized prototypical stimuli in total faster than exceptions (see Figure 6).

### FIGURE LEGEND - Supplements

**Figure 1.** Correct responses (in percent) for categorization of prototypical stimuli and exceptions separated for female and male gamer.

**Figure 2.** Correct responses (in percent) for categorization of prototypical stimuli and exceptions separated for female and male non-gamer.

**Figure 3.** Scatterplots of categorization performance separated for group and gender.

**Figure 4.** Reaction times (ms) for categorization of prototypical stimuli and exceptions of female and male gamer.

**Figure 5.** Reaction times (ms) for categorization of prototypical stimuli and exceptions of female and male non-gamer.

## TABLES - Supplements

**Table 1.** EEG trials included in the analyses (mean, SD) and removed after artefact correction (mean, SD) separated for each condition and group.

|                  | Prototypical Stimuli |            | Exception  |            |
|------------------|----------------------|------------|------------|------------|
|                  | Included             | removed    | Included   | Removed    |
| <b>Gamer</b>     | 405 (14.7)           | 2.6 (2.0)  | 67.8 (3.3) | 0 (0)      |
| <b>Non-Gamer</b> | 379 (36.4)           | 5.2 (19.9) | 63.7 (6.5) | 0.11 (0.4) |

Data are presented as mean  $\pm$  SDM.

**Table 2.** Gender-distributed correct categorization performance (%) of gamers and non-gamers.

|                            | Gamer         |               | Non-Gamer     |               |
|----------------------------|---------------|---------------|---------------|---------------|
|                            | Men           | Women         | Men           | Women         |
| <b><u>Prototypical</u></b> |               |               |               |               |
| Block 1                    | 62.84 (12.91) | 57.14 (20.20) | 92.86 (2.38)  | 65.56 (9.87)  |
| Block 2                    | 74.23 (13.86) | 87.50 (7.58)  | 80.56 (5.37)  | 70.49 (13.02) |
| Block 3                    | 80.19 (13.41) | 98.21 (0.84)  | 87.30 (4.51)  | 81.97 (9.27)  |
| Block 4                    | 92.77 (7.06)  | 95.24 (6.73)  | 90.08 (2.75)  | 85.03 (8.92)  |
| Block 5                    | 89.20 (9.64)  | 100.00 (0.00) | 63.89 (10.67) | 91.92 (6.39)  |
| <b><u>Exception</u></b>    |               |               |               |               |
| Block 1                    | 41.33 (19.65) | 39.29 (35.36) | 69.05 (16.50) | 33.67 (25.44) |
| Block 2                    | 53.06 (24.70) | 35.71 (10.10) | 26.19 (8.25)  | 37.24 (21.19) |
| Block 3                    | 79.59 (17.69) | 82.14 (5.05)  | 33.33 (39.34) | 68.88 (21.26) |
| Block 4                    | 79.08 (23.52) | 92.86 (10.10) | 57.14 (25.75) | 74.49 (17.43) |
| Block 5                    | 87.24 (16.85) | 100.00 (0.00) | 71.43 (14.29) | 84.69 (16.54) |

Data are presented as mean  $\pm$  SDM.
