# Supplementary material for: Play to Win: Action Video Game Experience and Attention Driven Perceptual Exploration in Categorization Learning
Source: PubMed Central journal article supplement (PMC7239510; doi:10.3389/fpsyg.2020.00933), 2020-05-13
Supplement: Data_Sheet_2.pdf [file Data_Sheet_2.pdf]

# Screening Questionnaire

Please enter your test person code (VPN code)!

It is composed of a capital G, the first letter of your first and last name, your month and year of birth. **Example:**

Sarah Mustermann, born on 19.07.85 = GSM0785

Date of birth: \_\_\_\_\_

Gender:  male

female

Average action video game consumption per week

≤ 4h    ≤ 8h    ≤ 15h    > 20h

Handedness:

right    left

What educational qualifications do you have?

- Hauptschulabschluss
- Realschulabschluss
- Abitur
- Technical college/university degree
- Other

What is your current occupation?

- trainee
- (psychology) student
- PhD student
- working
- looking for work
- Pensioner

Are you aware of any previous neurological disorders?

yes    no

If so, which one: \_\_\_\_\_

Are you aware of any previous psychological illnesses?

yes    no

If so, which one: \_\_\_\_\_

Are you currently taking any medication (including hormonal contraceptives)?  yes  no

If so, which \_\_\_\_\_

Do you need a visual aid?

no  yes \_\_\_\_\_ **Diopters** If yes, balanced?  yes  no

Are you (currently) taking illegal drugs?

never  rarely  often  very often
